# Supplementary material for: Comparative Pharmacokinetics and Allometric Scaling of Carboplatin in Different Avian Species
Source: PubMed Central journal article supplement (PMC4519271; doi:10.1371/journal.pone.0134177), 2015-07-29
Supplement: pone.0134177.s002.pdf [file pone.0134177.s002.pdf]

**S2 Table.** Results of the within-run and between-run accuracy and precision for quantification of free carboplatin in plasma of chickens, ducks, pigeons and parakeets

| Avian species | Theoretical concentration (ng/mL) | Mean concentration $\pm$ SD (ng/mL) | Precision RSD (%) | Accuracy (%) |
|---------------|-----------------------------------|-------------------------------------|-------------------|--------------|
| Chicken       | 20 <sup>a</sup>                   | 17.3 $\pm$ 1.33                     | 7.7               | -13.7        |
|               | 50 <sup>a</sup>                   | 44.3 $\pm$ 1.32                     | 3.0               | -11.4        |
|               | 50 <sup>b</sup>                   | 46.1 $\pm$ 4.07                     | 8.8               | -7.8         |
|               | 500 <sup>a</sup>                  | 490.8 $\pm$ 5.13                    | 1.0               | -1.8         |
|               | 500 <sup>b</sup>                  | 459.7 $\pm$ 33.26                   | 17.2              | -8.1         |
|               | 5000 <sup>a</sup>                 | 4504.1 $\pm$ 168.95                 | 3.8               | -9.9         |
|               | 5000 <sup>b</sup>                 | 4380.1 $\pm$ 236.55                 | 5.4               | -12.4        |
|               | 20000 <sup>a</sup>                | 17088.9 $\pm$ 442.97                | 2.6               | -14.6        |
| Duck          | 20 <sup>a</sup>                   | 19.5 $\pm$ 1.408                    | 7.2               | -2.7         |
|               | 50 <sup>a</sup>                   | 48.4 $\pm$ 3.15                     | 6.5               | -3.2         |
|               | 50 <sup>b</sup>                   | 45.4 $\pm$ 4.16                     | 9.2               | -9.1         |
|               | 500 <sup>a</sup>                  | 467.9 $\pm$ 14.52                   | 3.1               | -6.4         |
|               | 500 <sup>b</sup>                  | 484.0 $\pm$ 58.39                   | 12.1              | -3.2         |
|               | 5000 <sup>a</sup>                 | 4674.6 $\pm$ 79.34                  | 1.7               | -6.5         |
|               | 5000 <sup>b</sup>                 | 4600.7 $\pm$ 566.72                 | 12.3              | -8.0         |
|               | 50000 <sup>a</sup>                | 48432.1 $\pm$ 2486.40               | 5.1               | -3.9         |
| Pigeon        | 50 <sup>a</sup>                   | 47.1 $\pm$ 3.16                     | 6.7               | -5.9         |
|               | 50 <sup>b</sup>                   | 47.8 $\pm$ 4.72                     | 9.9               | -4.4         |
|               | 500 <sup>a</sup>                  | 428.2 $\pm$ 8.20                    | 1.9               | -14.4        |
|               | 500 <sup>b</sup>                  | 467.2 $\pm$ 30.99                   | 6.6               | -6.6         |
|               | 5000 <sup>a</sup>                 | 4290.3 $\pm$ 185.93                 | 4.3               | -14.2        |
|               | 5000 <sup>b</sup>                 | 4671.4 $\pm$ 402.71                 | 8.6               | -6.6         |
|               | 20000 <sup>a</sup>                | 19722.7 $\pm$ 1936.54               | 9.8               | -1.4         |
| Parakeet      | 100 <sup>a</sup>                  | 94.4 $\pm$ 5.48                     | 5.8               | -5.6         |
|               | 500 <sup>a</sup>                  | 479.6 $\pm$ 14.64                   | 3.1               | -4.1         |
|               | 500 <sup>b</sup>                  | 478.9 $\pm$ 20.12                   | 4.2               | -4.2         |
|               | 5000 <sup>a</sup>                 | 5043.6 $\pm$ 80.98                  | 1.6               | 0.9          |
|               | 5000 <sup>b</sup>                 | 5274.1 $\pm$ 202.51                 | 3.8               | 5.5          |
|               | 20000 <sup>a</sup>                | 20427.4 $\pm$ 413.62                | 2.0               | 2.1          |

<sup>a</sup> Within-run accuracy and precision (n=6)

<sup>b</sup> Between-run accuracy and precision (n=6); SD: standard deviation; RSD: relative standard deviation; Acceptance criteria: accuracy: -20% to +10%, within-run precision (RSD<sub>max</sub>): 20 ng/mL: 19.2%, 50 ng/mL: 16.7%, 500 ng/mL: 11.8%, 5000 ng/mL: 8.4%, 20000 ng/mL: 6.8%, 50000 ng/mL: 5.9%; between-run precision: 50 ng/mL: 25.1%, 500 ng/mL: 17.8%, 1000 ng/mL: 16.0%, 5000 ng/mL: 12.6%
